# Supplementary material for: Safe-and-Sustainable-by-Design Framework Based on a Prospective Life Cycle Assessment: Lessons Learned from a Nano-Titanium Dioxide Case Study
Source: MDPI journal article supplement (doi:10.3390/ijerph19074241), 2022-04-02
Supplement: s1 [file s1]

# Safe-and-sustainable-by-design framework based on a prospective life cycle assessment: lessons learned from a nano-titanium dioxide case study

---

Georgios Archimidis Tsalidis, Lya G. Soeteman-Hernandez, Cornelle W. Noorlander, Saeed Saedy, Ruud van Ommen, Martina G. Vijver, Gijsbert Korevaar

## Supplementary Material

The Supplementary Material contains Tables which were omitted from the manuscript:

Table S1 presents descriptions and units for the Effect Factor, Human Effect Factor and Exposure factor of Step 8 of the framework.

Table S2 shows the Life Cycle Inventory of reference system

Table S3 shows the Life Cycle Inventory of additional processes for original system

Table S4 shows the calculation of characterization factors for freshwater ecotoxicity and human toxicity

Table S1. Data needed from nano-toxicity studies

| Parameter                 |  | Description                                                                                                                                                                                       | Unit                    |
|---------------------------|--|---------------------------------------------------------------------------------------------------------------------------------------------------------------------------------------------------|-------------------------|
| Effect Factor (EF)        |  | Hazardous concentrations of a substance at which 50% of the species are exposed to a concentration above their $EC_{50}$ (i.e. concentration of a nanoparticle that gives half-maximal response). | $kg.m^{-3}$             |
| Human Effect Factor (HEF) |  | Change in lifetime disease probability due to change in lifetime intake of a pollutant. It is calculated based on $ED_{50}$ values which are extrapolated from animal in vivo tests.              | $case.kg_{intake}^{-1}$ |
| Exposure Factor (XF)      |  | Dissolved fraction of NPs in an environmental compartment, e.g. aquatic environment. Occurring transformation processes are important, such as agglomeration.                                     | dimensionless           |

Table S2. Life Cycle Inventory of reference system

| Input                               |        |      | Output                                |         |                    |
|-------------------------------------|--------|------|---------------------------------------|---------|--------------------|
| TiO <sub>2</sub> -NP production [1] |        |      |                                       |         |                    |
| Electricity                         | 2.85   | kWh  | TiO <sub>2</sub> -NP                  | 1       | kg                 |
| V–Ti magnetite ore                  | 5.71   | kg   | GWP                                   | 5.53    | kg CO <sub>2</sub> |
| Steel ball                          | 0.001  | kg   |                                       |         |                    |
| Anthracite                          | 10.076 | MJ   |                                       |         |                    |
| Coke                                | 0.693  | kg   |                                       |         |                    |
| Liquid chlorine                     | 0.25   | kg   |                                       |         |                    |
| Aluminum powder                     | 0.06   | kg   |                                       |         |                    |
| Oxygen                              | 0.693  | kg   |                                       |         |                    |
| Liquid caustic soda (30 %)          | 0.3    | kg   |                                       |         |                    |
| Saturated steam (1.3 MPa)           | 5.5    | kg   |                                       |         |                    |
| Petrol                              | 0.017  | kg   |                                       |         |                    |
| Diesel                              | 0.011  | kg   |                                       |         |                    |
| Hydrogen production                 |        |      |                                       |         |                    |
| TiO <sub>2</sub> -NP                | 2.4    | mg   | H <sub>2</sub>                        | 63.012  | μmol               |
| Light (from lamp)                   | 500    | W    | H <sub>2</sub>                        | 0.00012 | g                  |
| Water                               | 21.6   | ml   | Waste methanol (O <sub>2</sub> bound) | 23.9998 | g                  |
| Methanol                            | 2.4    | ml   |                                       |         |                    |
| Catalyst                            | 1      | unit | Factor for 1 g H <sub>2</sub>         | 7872.4  |                    |

Table S3. Life Cycle Inventory of additional processes for original system

| Input                                                                                                               |          |    | Output                                                          |          |      |
|---------------------------------------------------------------------------------------------------------------------|----------|----|-----------------------------------------------------------------|----------|------|
| Copper acetate [2]                                                                                                  |          |    |                                                                 |          |      |
| Copper(II) carbonate                                                                                                | 247.1098 | kg | Cu(CH <sub>3</sub> COO) <sub>2</sub>                            | 363.26   | kg   |
| Acetic acid                                                                                                         | 180.156  | kg |                                                                 |          |      |
| Sodium hydroxide                                                                                                    | 147.2    | kg |                                                                 |          |      |
| Copper(II) hexafluoroacetylacetonate hydrate (C <sub>10</sub> H <sub>4</sub> CuF <sub>12</sub> O <sub>5</sub> ) [2] |          |    |                                                                 |          |      |
| Cu(CH <sub>3</sub> COO) <sub>2</sub>                                                                                | 181.63   | kg | C <sub>10</sub> H <sub>4</sub> CuF <sub>12</sub> O <sub>5</sub> | 569.84   | kg   |
| Hexafluoroacetylacetone dihydrate                                                                                   | 388.21   | kg |                                                                 |          |      |
| Nanocoating with ALD                                                                                                |          |    |                                                                 |          |      |
| TiO <sub>2</sub> -NP                                                                                                | 1.5      | g  | TiO <sub>2</sub> coated with CuO                                | 1.554484 | g    |
| C <sub>10</sub> H <sub>4</sub> CuF <sub>12</sub> O <sub>5</sub>                                                     | 0.3395   | g  | CO <sub>2</sub>                                                 | 0.105096 | g    |
| Dionized water                                                                                                      | 5        | L  |                                                                 |          |      |
| Pressurized nitrogen liquid                                                                                         | 544.6952 | g  |                                                                 |          |      |
| Cooling water                                                                                                       |          | L  |                                                                 |          |      |
| Electricity for heating tapes                                                                                       | 945      | Wh |                                                                 |          |      |
| Hydrogen production                                                                                                 |          |    |                                                                 |          |      |
| TiO <sub>2</sub> coated with CuO                                                                                    | 2.484    | mg | H <sub>2</sub>                                                  | 319.3335 | μmol |
| Light (from lamp)                                                                                                   | 500      | Wh | Waste methanol (O <sub>2</sub> bound)                           | 23.99936 | g    |
| Water                                                                                                               | 21.6     | ml |                                                                 |          |      |
| Methanol                                                                                                            | 2.4      | ml |                                                                 |          |      |

Table S4. Calculation of characterization factors for freshwater ecotoxicity and human toxicity

| <b>Freshwater ecotoxicity</b> | P25  | CuO   | <b>Human toxicity</b> | P25  | CuO   |
|-------------------------------|------|-------|-----------------------|------|-------|
| EF                            | 26.9 | 7.025 | EF                    | 2.70 | 0.045 |
| FF                            | 128  | 2520  | FF                    | 130  | 22    |
| XF                            | 1    | 1     | XF                    | 1    | 1     |

## References

1. Liao, W.; Heijungs, R.; Huppes, G. Thermodynamic Resource Indicators in LCA: A Case Study on the Titania Produced in Panzhihua City, Southwest China. *Int J Life Cycle Assess* **2012**, *17*, 951–961, doi:10.1007/s11367-012-0429-4.
2. Zhang, T.; Gu, H.; Ding, F.; Qu, F.; Dai, S. Synthesis, Characterization, and Thermostability of Bis(2,2,6,6-Tetramethyl-3, 5-Heptanedionato)Copper(II). *Rare Metals* **2012**, *31*, 343–349, doi:10.1007/s12598-012-0518-3.
